# Supplementary material for: Cost-effectiveness of nivolumab in patients with advanced renal cell carcinoma treated in the United States
Source: Springer Nature journal article supplement (doi:10.1186/s40164-018-0095-8), 2018-02-09
Supplement: MOESM1 [file 15455282]

Additional file 1

Table S1 Disease management costs (PF and PD health states) and end-of-life/terminal care costs

| Resource name                          | No. required per 4 weeks | Unit cost (\$US) | Reference                                                                                                                                                        |
|----------------------------------------|--------------------------|------------------|------------------------------------------------------------------------------------------------------------------------------------------------------------------|
| <b>PF</b>                              |                          |                  |                                                                                                                                                                  |
| Office visit                           | 0.104                    | 79.67            | CMS Physician Fee Schedule. HCPCS code: 99214 (office visit, established patient, facility price), National payment amount                                       |
| Community nurse visit                  | 0                        | 25.84            | CMS Physician Fee Schedule. HCPCS code: 99212 (office visit, established patient, facility price), National payment amount                                       |
| CT scan                                | 0.028                    | 467.99           | CMS Physician Fee Schedule. HCPCS code: 74160 (CT abdomen w/ dye, facility price, all modifiers), National payment amount                                        |
| MRI                                    | 0.036                    | 920.90           | CMS Physician Fee Schedule. HCPCS code: 74182 (MRI abdomen w/ dye, facility price, all modifiers), National payment amount                                       |
| Blood test, CBC                        | 0.081                    | 8.87             | CMS Physician Fee Schedule: 85004, Medicare Laboratory Fee Schedule (2017)                                                                                       |
| Comprehensive metabolic panel          | 0.756                    | 11.60            | CMS Laboratory Fee Schedule: 80048, Medicare Laboratory Fee Schedule (2017)                                                                                      |
| Morphine sulphate, oral                | 0.019                    | 0.89             | WAC, Medi-Span; 15 mg every 4 hours                                                                                                                              |
| Morphine sulphate, IV drug acquisition | 0                        | 6.76             | WAC, Medi-Span (assumed 10 mg per day dosage)                                                                                                                    |
| Morphine sulphate, IV administration   | 0.027                    | 58.14            | CMS Physician Fee Schedule. HCPCS code: 96376 (injection, facility price), National payment amount                                                               |
| Oxycodone HCl, oral                    | 0.051                    | 1.01             | WAC, Medi-Span; 60 mg every 4 hours                                                                                                                              |
| <b>PD</b>                              |                          |                  |                                                                                                                                                                  |
| Office visit                           | 0.188                    | 79.67            | CMS Physician Fee Schedule. HCPCS code: 99214 (office visit, established patient, facility price), National payment amount                                       |
| Community nurse visit                  | 0                        | 25.84            | CMS Physician Fee Schedule. HCPCS code: 99212 (office visit, established patient, facility price), National payment amount                                       |
| CT scan                                | 0.044                    | 467.99           | CMS Physician Fee Schedule. HCPCS code: 74160 (CT abdomen w/ dye, facility price, all modifiers), National payment amount                                        |
| MRI                                    | 0.047                    | 920.90           | Centers for Medicare & Medicaid Service - Physician Fee Schedule. HCPCS code: 74182 (MRI abdomen w/ dye, facility price, all modifiers), National payment amount |
| Blood test, CBC                        | 0.079                    | 8.87             | CMS Physician Fee Schedule: 85004, Medicare Laboratory Fee Schedule (2017)                                                                                       |
| Comprehensive metabolic panel          | 0.736                    | 11.60            | CMS Laboratory Fee Schedule: 80048, Medicare Laboratory Fee Schedule (2017)                                                                                      |
| Morphine sulphate, oral                | 0.033                    | 0.89             | WAC, Medi-Span; 15 mg every 4 hours                                                                                                                              |

| Resource name                          | No. required per 4 weeks | Unit cost (\$US) | Reference                                                                                                                                                                                                                           |
|----------------------------------------|--------------------------|------------------|-------------------------------------------------------------------------------------------------------------------------------------------------------------------------------------------------------------------------------------|
| Morphine sulphate, IV drug acquisition | 0.001                    | 6.76             | WAC, Medi-Span (assumed 10 mg per day dosage)                                                                                                                                                                                       |
| Morphine sulphate, IV administration   | 0.058                    | 58.14            | CMS Physician Fee Schedule. HCPCS code: 96376 (injection, facility price), National payment amount                                                                                                                                  |
| Oxycodone HCl, oral                    | 0.11                     | 1.01             | WAC, Medi-Span; 60 mg every 4 hours                                                                                                                                                                                                 |
| <b>End-of-life/terminal care costs</b> |                          |                  |                                                                                                                                                                                                                                     |
| Resource Name                          | No. Required             | Unit Cost (\$US) | Reference                                                                                                                                                                                                                           |
| End-of-life care                       | 1                        | 10,713.01        | Cost initially sourced from Perrin et al. and inflated from 2014 to 2017. Values using a "Medical care" CPI in Table 25, page 82 of 121 [ <a href="https://www.bls.gov/cpi/cpid1705.pdf">https://www.bls.gov/cpi/cpid1705.pdf</a> ] |

CBC, complete blood count; CMS, US Centers for Medicare and Medicaid Services; CPI, consumer price index; IV, intravenous; PD, progressive disease health state; PF, progression-free disease health state; WAC, wholesale acquisition cost

**Table S2 Drug acquisition costs used in the base-case model**

| <b>Treatment</b>    | <b>Formulation per vial/cap</b> | <b>Vial size or tablets per pack</b> | <b>Unit cost per vial or pack 2015 (\$US)</b> | <b>Reference</b>    |
|---------------------|---------------------------------|--------------------------------------|-----------------------------------------------|---------------------|
| <b>Nivolumab</b>    | 10 mg/mL                        | 10 mL                                | 2545.15                                       | Medi-Span WAC price |
| <b>Nivolumab</b>    | 10 mg/mL                        | 4 mL                                 | 1018.06                                       | Medi-Span WAC price |
| <b>Everolimus</b>   | 10 mg                           | 28                                   | 13,233.17                                     | Medi-Span WAC price |
| <b>Axitinib</b>     | 5 mg                            | 60                                   | 13,680.23                                     | Medi-Span WAC price |
| <b>Pazopanib</b>    | 200 mg                          | 120                                  | 11,018.87                                     | Medi-Span WAC price |
| <b>Sunitinib</b>    | 50 mg                           | 28                                   | 16,208.76                                     | Medi-Span WAC price |
| <b>Temsirolimus</b> | 25 mg/mL                        | 1 mL                                 | 1718.05                                       | Medi-Span WAC price |
| <b>Bevacizumab</b>  | 25 mg/mL                        | 16 mL                                | 3034.16                                       | Medi-Span WAC price |
| <b>Sorafenib</b>    | 200 mg                          | 120                                  | 16,479.43                                     | Medi-Span WAC price |
| <b>Cabozantinib</b> | 20 mg                           | 84                                   | 14,788.84                                     | Medi-Span WAC price |

WAC, wholesale acquisition cost

**Table S3 Subsequent treatments used in base-case model (treatment duration based on the Global Oncologic Learnings for Dovitinib in Renal Cell Carcinoma Trial<sup>a</sup>)**

| <b>Subsequent treatment</b> | <b>Cost of treatment<sup>b</sup> (\$US)</b> | <b>Nivolumab arm</b> | <b>Everolimus arm</b> |
|-----------------------------|---------------------------------------------|----------------------|-----------------------|
| <b>Nivolumab</b>            | 44,685.99                                   | 0%                   | 0%                    |
| <b>Everolimus</b>           | 52,821.96                                   | 48%                  | 9%                    |
| <b>Axitinib</b>             | 50,977.14                                   | 45%                  | 60%                   |
| <b>Pazopanib</b>            | 41,121.51                                   | 17%                  | 26%                   |
| <b>Sunitinib</b>            | 48,419.59                                   | 13%                  | 14%                   |
| <b>Temsirolimus</b>         | 29,799.00                                   | 5%                   | 5%                    |
| <b>Bevacizumab</b>          | 44,402.41                                   | 6%                   | 9%                    |
| <b>Sorafenib</b>            | 61,343.22                                   | 12%                  | 15%                   |
| <b>Best supportive care</b> | 316.11                                      | 0%                   | 0%                    |
| <b>Cabozantinib</b>         | 58,994.46                                   | 8%                   | 3%                    |

<sup>a</sup> Reference: Lancet Oncol. 2014;15:286–96.

<sup>b</sup> For a treatment duration of 3.65 months. Costs include drug acquisition, drug administration, and monitoring
